# Supplementary material for: Detection of genome-edited mutant clones by a simple competition-based PCR method
Source: PubMed Central journal article supplement (PMC5460891; doi:10.1371/journal.pone.0179165), 2017-06-06
Supplement: pone.0179165.s003.pdf [file pone.0179165.s003.pdf]

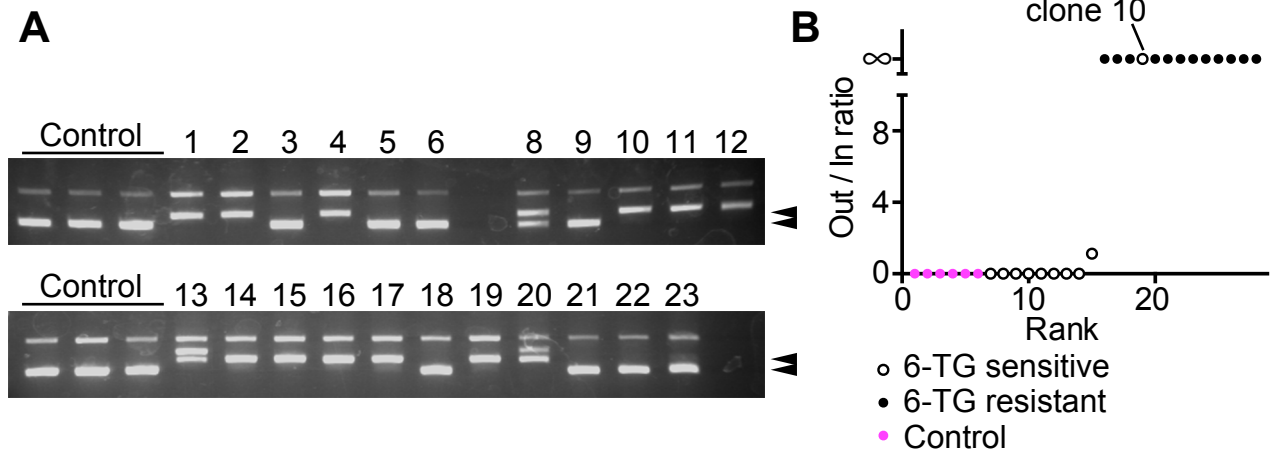

### S3 Fig

Further optimization of primers for detecting HPRT1 mutant clones. (A) Result of cbPCR using an F-in primer shorter than in Fig 4. The bands of expected sizes are illustrated by arrowheads. (B) Quantification of band intensities reveals a total lack of in-amplicon in 6-TG resistant clones as well as clone #10.
